# Supplementary material
Source: PubMed Central journal article supplement (PMC4563781)
Supplement: cdd201515x1.pdf [file cdd201515x1.pdf]

## SUPPLEMENTARY INFORMATION

Iyer et al.,

**Bak apoptotic pores involve a flexible C-terminal region and juxtaposition of the C-terminal transmembrane domains**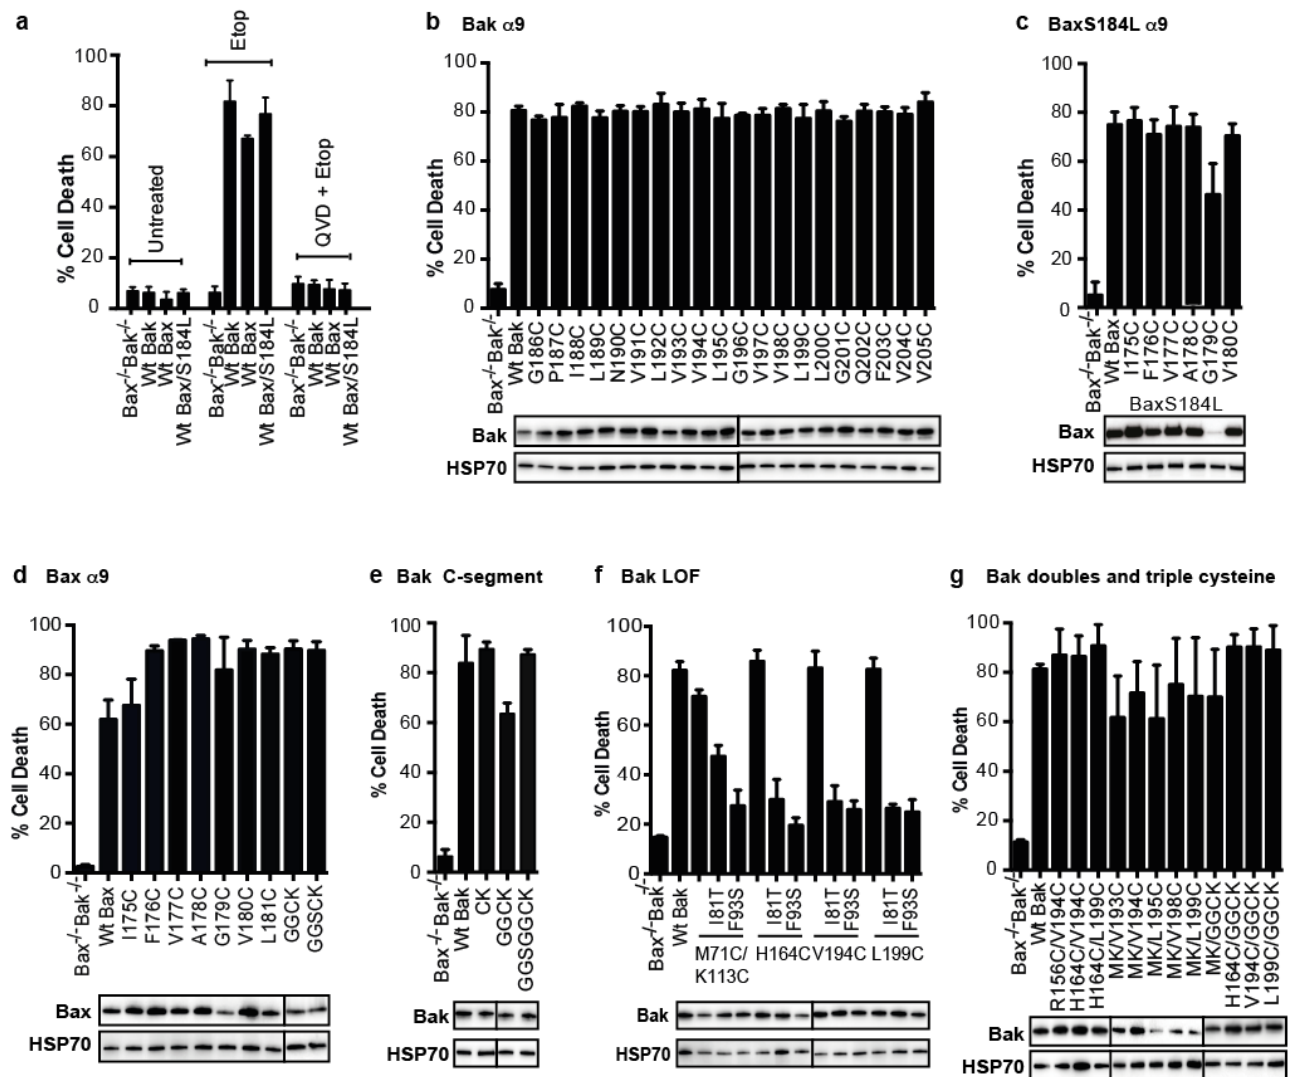

**Figure S1. Most cysteine substitutions in Bak and Bax do not alter protein expression or pro-apoptotic function. (Relates to Figs 1-7)**

(a) Cell death induced by etoposide is apoptotic. *Bak<sup>-/-</sup>Bax<sup>-/-</sup>* MEFs stably expressing hBak, hBax or hBaxS184L were untreated or treated with etoposide (10  $\mu$ M) for 24 h and cell death assessed by uptake of propidium iodide. Note that samples pre-incubated for 1 h with Q-VD-OpH (pan-caspase inhibitor; 50  $\mu$ M) prevented propidium iodide uptake indicating etoposide-induced death is apoptotic.

(b-g) Etoposide-induced cell death. *Bak<sup>-/-</sup>Bax<sup>-/-</sup>* MEFs stably expressing the indicated Bak (b), BaxS184L (c), Bax (d), Bak C-segment extensions (e), Bak loss-of-function (f) or Bak double and triple cysteine (g) variants were incubated with etoposide (10  $\mu$ M) for 24 h and apoptosis assessed by uptake of propidium iodide.

Data are mean  $\pm$  SD of three independent experiments. Protein expression levels were assessed by immunoblotting whole cell lysates for Bak or Bax, and for HSP70 as loading control.

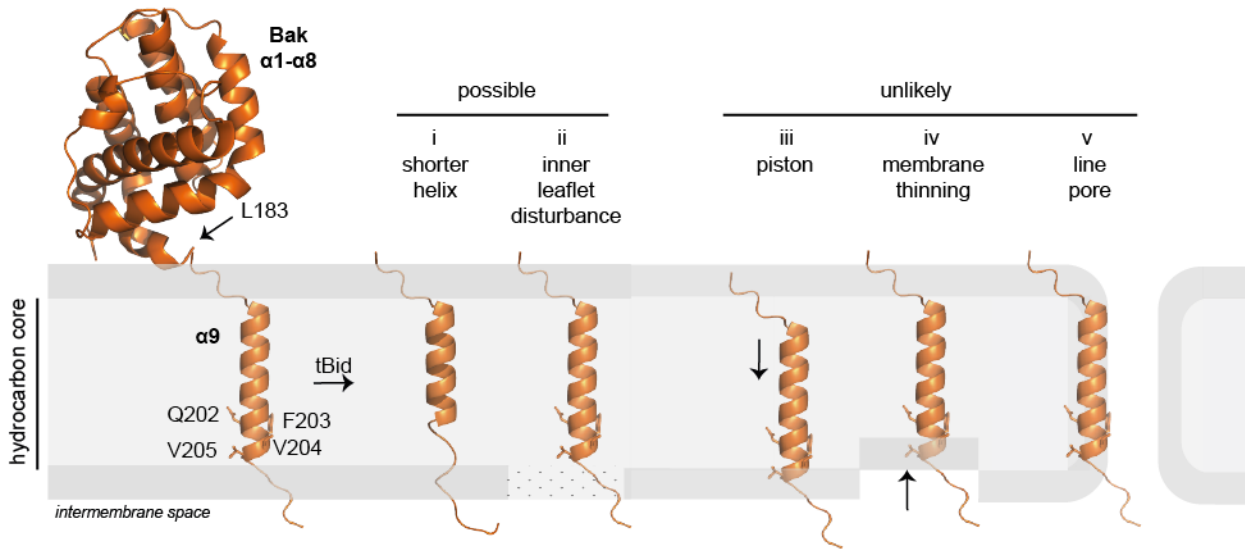

**Figure S2. Possible membrane topology of the Bak C-terminus after pore formation. (Relates to Fig 2)**

Diagram of changes in the Bak C-terminus after tBid-induced activation and pore formation, as discussed in the text. After Bak activation and pore formation, the most significant change in  $\alpha 9$  labeling (apart from decreased labeling due to greater insertion) was increased labeling of four residues (Q202C-V205C) at the carboxy terminus. Increased labeling of these 4 residues might be explained by (i) the  $\alpha 9$ -helix becoming shorter, by (ii) IASD penetrating further into the inner leaflet of the MOM as a consequence of pore formation, or by  $\alpha 9$  dissociating from neighbouring proteins (not shown). The labeling is not consistent with (iii)  $\alpha 9$  positioning deeper in the membrane, as labeling of the amino-terminus (G186C-N190C) did not decrease after tBid. In addition, (iv) membrane thinning as observed in Bax-permeabilized vesicles<sup>1</sup> is also unlikely as G201C labeling did not increase. Finally, as the center of  $\alpha 9$  did not label along one edge after tBid treatment, it is unlikely that (v)  $\alpha 9$  lines the apoptotic pore formed by Bak. The C-terminus is modeled as in Figure 2C. Cartoon of Bak  $\alpha 1-\alpha 8$  (aa21-183) is from the structure of nonactivated Bak (2IMT<sup>2</sup>).

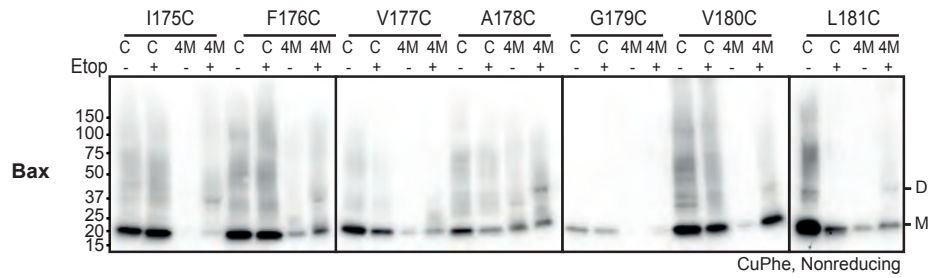

**Figure S3. Intermolecular  $\alpha9:\alpha9$  linkage can be captured in activated Bax at membranes. (Relates to Fig 3)**

*Bak*<sup>-/-</sup>*Bax*<sup>-/-</sup>MEFs expressing the indicated Bax cysteine variants were cultured with etoposide (10  $\mu$ M), and were able to mediate cell death (Fig S1c). The cytosolic (C) and membrane (M) fractions were treated with CuPhe to induce disulfide bonding and then analyzed by nonreducing SDS-PAGE and western blot for Bax to reveal monomers (M) and linked dimers (D). Note that due to the low level of Bax that translocates to mitochondria during apoptosis, 4-fold membrane fraction (4M) was loaded.

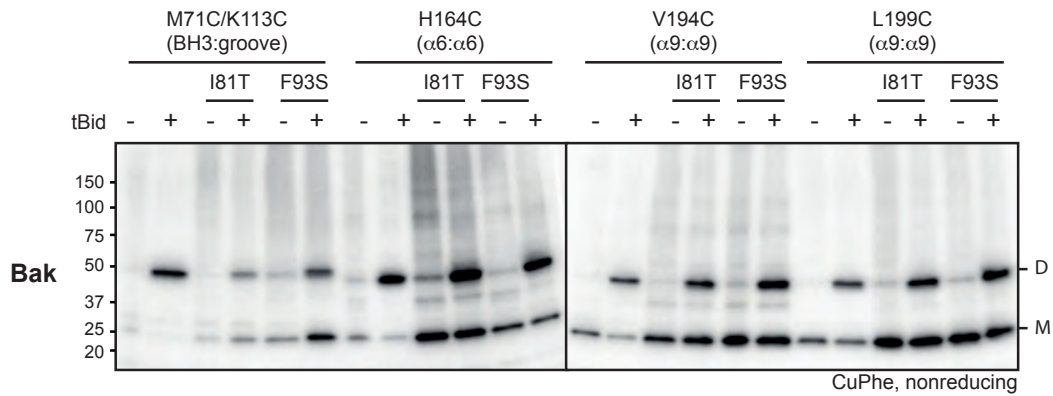

**Figure S4. The Bak  $\alpha 9:\alpha 9$  interface is partially inhibited when the BH3:groove interface is inhibited by mutagenesis. (Relates to Fig 5)**

Membrane fractions from *Bak*<sup>-/-</sup>*Bax*<sup>-/-</sup>MEFs expressing the indicated cysteine variants were incubated without or with tBid. Some variants also contained a loss-of-function mutation in the BH3 domain (I81T) or groove (F93S) to inhibit BH3:groove dimerization<sup>3</sup>. Aliquots were assessed for cysteine linkage by CuPhe as in Figure S3.

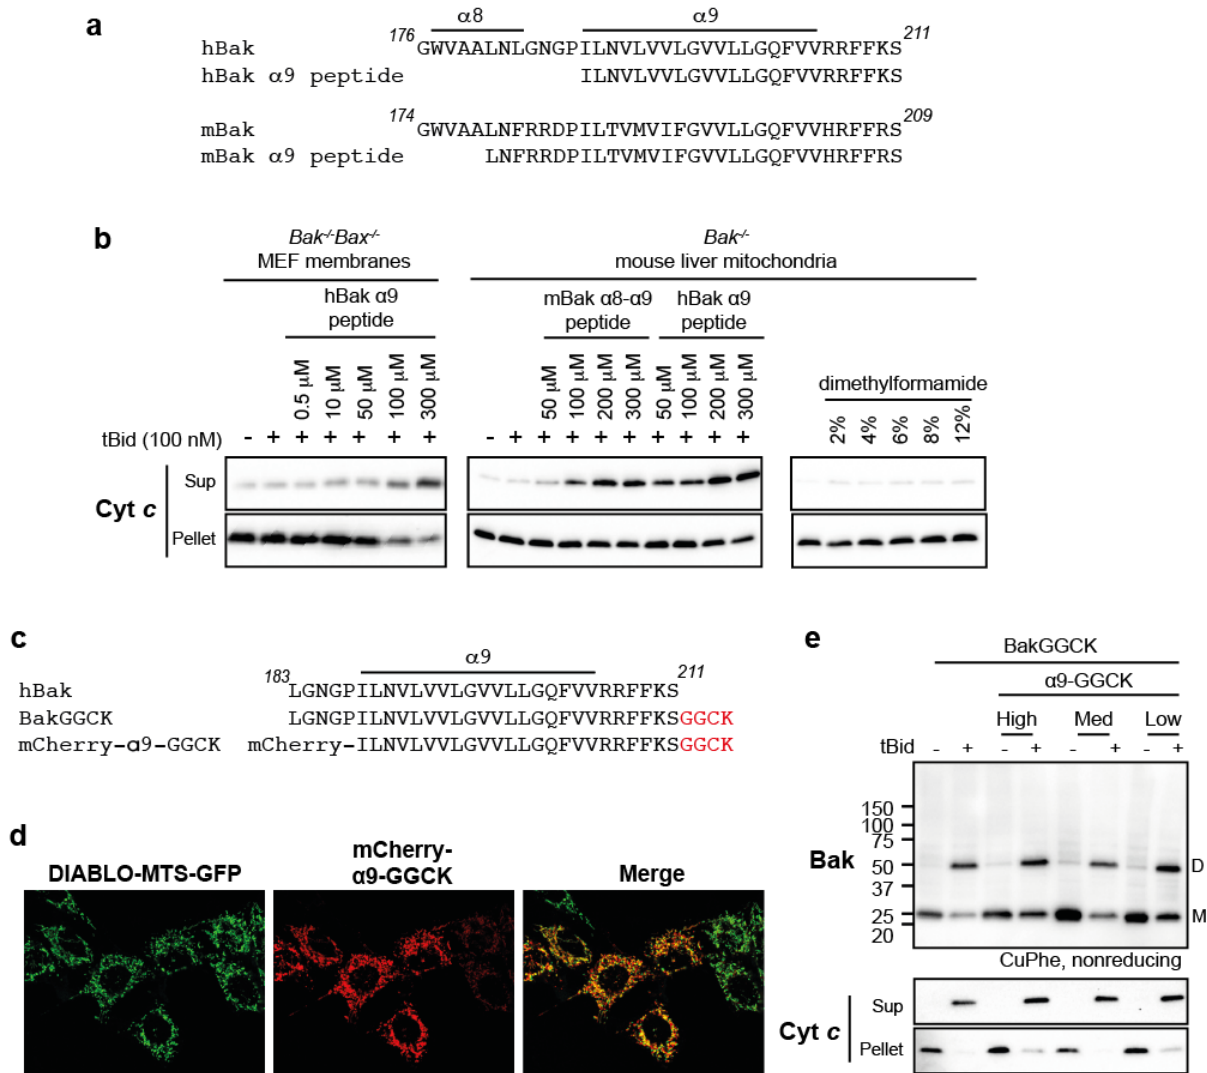

**Figure S5. Bak  $\alpha_9$  peptides or overexpressed Bak  $\alpha_9$  in cells cannot block the  $\alpha_9$ :  $\alpha_9$  interface**

(a) Sequences of  $\alpha_9$  peptides from human and mouse Bak.

(b) Bak  $\alpha_9$  peptides induce cytochrome *c* release. Membrane fractions from *Bak<sup>-/-</sup>Bax<sup>-/-</sup>* MEFs or mitochondria isolated from *Bak<sup>-/-</sup>* mouse liver as described previously<sup>3</sup> were incubated with  $\alpha_9$  peptides at 30 °C for 20 min, followed by incubation with tBid for 30 min, as indicated. Aliquots were tested for cytochrome *c* release as in Figure 5. Note that peptides (Mimotopes, Victoria, Australia) were initially prepared as a 2 mM stock in 80% dimethylformamide, and that dimethylformamide alone did not release cytochrome *c*. Data are representative of two independent experiments.

(c) Sequence of mCherry- $\alpha_9$ -GGCK.

(d) mCherry- $\alpha_9$ -GGCK localizes to mitochondria. MEFs expressing the DIABLO mitochondrial targeting sequence fused to GFP (DIABLO-MTS-GFP<sup>4</sup>) were stably transduced with mCherry- $\alpha_9$ -GGCK, and seeded (20,000 cells per well) on tissue culture-treated chamber slides (Ibidi). When analyzed by confocal microscopy (Zeiss LSM 5 LIVE), despite a range of mCherry- $\alpha_9$ -GGCK expression levels, all protein becomes punctate, consistent with mitochondrial localization.

(d) mCherry- $\alpha_9$ -GGCK fails to block either  $\alpha_9$  linkage in oligomerized Bak or cytochrome *c* release. *Bak<sup>-/-</sup>Bax<sup>-/-</sup>* MEFs expressing BakGGCK and low, medium or high levels of mCherry- $\alpha_9$ -GGCK (based on mCherry expression) were permeabilized and incubated with tBid. Samples were assessed for BakGGCK:BakGGCK linkage (D) and cytochrome *c* release as in Figure 6.

**SUPPLEMENTARY REFERENCES**

1. Satsoura D, Kucerka N, Shivakumar S, Pencer J, Griffiths C, Leber B, *et al.* Interaction of the full-length Bax protein with biomimetic mitochondrial liposomes: a small-angle neutron scattering and fluorescence study. *Biochim Biophys Acta* 2012 Mar; **1818**(3): 384-401.
2. Moldoveanu T, Liu Q, Tocilj A, Watson MH, Shore G, Gehring K. The x-ray structure of a BAK homodimer reveals an inhibitory zinc binding site. *Mol Cell* 2006 December 8, 2006; **24**(5): 677-688.
3. Dewson G, Kratina T, Sim HW, Puthalakath H, Adams JM, Colman PM, *et al.* To trigger apoptosis Bak exposes its BH3 domain and homo-dimerizes via BH3:groove interactions. *Mol Cell* 2008 May 9; **30**(3): 369-380.
4. Verhagen AM, Ekert PG, Pakusch M, Silke J, Connolly LM, Reid GE, *et al.* Identification of DIABLO, a mammalian protein that promotes apoptosis by binding to and antagonizing IAP proteins. *Cell* 2000 Jul 7; **102**(1): 43-53.
